# Supplementary material for: Loss of E-cadherin is causal to pathologic changes in chronic lung disease
Source: PubMed Central journal article supplement (PMC9617938; doi:10.1038/s42003-022-04150-w), 2022-10-29
Supplement: 42003_2022_4150_MOESM2_ESM.pdf [file 42003_2022_4150_MOESM2_ESM.pdf]

## Supplementary Information

Table S1: Primer details for genotyping the Mice

| Gene                                               | Primer (5'-3')                                                                                     | Product details                                                                             |
|----------------------------------------------------|----------------------------------------------------------------------------------------------------|---------------------------------------------------------------------------------------------|
| <i>Ager</i><br>(Alveolar Type I cells)             | ATC GCA TTC CTT GCA AAA GT<br>GGA CTC TTG TCC CAG AAG CA                                           | Mutant - ~500 bp<br>Wild type – 200 bp                                                      |
| <i>Cdh1</i><br>(E-cadherin)                        | GGG TCT CAC CGT AGT CCT CA<br>GAT CTT TGG GAG AGC AGT CG                                           | Mutant – 310 bp<br>Wild type – 243 bp                                                       |
| <i>Foxj1</i><br>(Ciliated cells)                   | P1: GCA GAT GGA GAG AGG TGG AG<br>P2: CTT GGC GTT GAG AAT GGA GA<br>P3: ATT GCA TCG CAT TGT CTG AG | Mutant – 294 bp (P2 & P3)<br>Heterozygote – 294 bp & 472 bp<br>Wild type – 472 bp (P1 & P2) |
| <i>Rosa</i><br>( <i>Cdh1</i> conditional knock-in) | CAC TTG CTC TCC CAA AGT CGC TC<br>ATA CTC CGA GGC GGA TCA CAA<br>GAT GGG GAG AGT GAA GCA GAA CG    | Mutant – 508 bp<br>Wild-type – 335 bp                                                       |
| <i>Scg1a1</i><br>(Club cells)                      | ACT CAC TAT TGG GGG TGT GG<br>CCA AAA GAC GGC AAT ATG GT                                           | Mutant – 245 bp                                                                             |
| <i>Spc</i><br>(Alveolar type II cells)             | ATG TCC AAT TTA CTG ACC G<br>CGC GCC TGA AGA TAT AGA AG                                            | ~250 bp                                                                                     |

Table S2: qPCR primer details to evaluate EMT and fibrosis markers

| Gene              | Primer                                                                 | Product details |
|-------------------|------------------------------------------------------------------------|-----------------|
| <b>Human</b>      |                                                                        |                 |
| <i>CDH1</i>       | F: GCC TCC TGA AAA GAG AGT GGA AG<br>R: TGG CAG TGT CTC TCC AAA TCC G  | 131 bp          |
| <i>GAPDH</i>      | F: GTC TCC TCT GAC TTC AAC AGC G<br>R: ACC ACC CTG TTG CTG TAG CCA A   | 131 bp          |
| <b>Mouse</b>      |                                                                        |                 |
| <i>Cdh1</i>       | F: CAT CAC TGC CAC CCA GAA GAC TG<br>R: ATG CCA GTG AGC TTC CCG TTC AG | 153 bp          |
| <i>Cdh2</i>       | F: CCT CCA GAG TTT ACT GCC ATG AC<br>R: GTA GGA TCT CCG CCA CTG ATT C  | 149 bp          |
| <i>Col3a1</i>     | F: GAC CAA AAG GTG ATG CTG GAC AG<br>R: CAA GAC CTC GTG CTC CAG TTA G  | 114 bp          |
| <i>Gapdh</i>      | F: CAT CAC TGC CAC CCA GAA GAC TG<br>R: ATG CCA GTG AGC TTC CCG TTC AG | 153 bp          |
| <i>Slug/Snai2</i> | F: TCT GTG GCA AGG CTT TCT CCA G<br>R: TGC AGA TGT GCC CTC AGG TTT G   | 133 bp          |
| <i>Snai1</i>      | F: TGT CTG CAC GAC CTG TGG AAA G<br>R: CTT CAC ATC CGA GTG GGT TTG G   | 163 bp          |
| <i>Twist1</i>     | F: GAT TCA GAC CCT CAA ACT GGC G<br>R: AGA CGG AGA AGG CGT AGC TGA G   | 134 bp          |

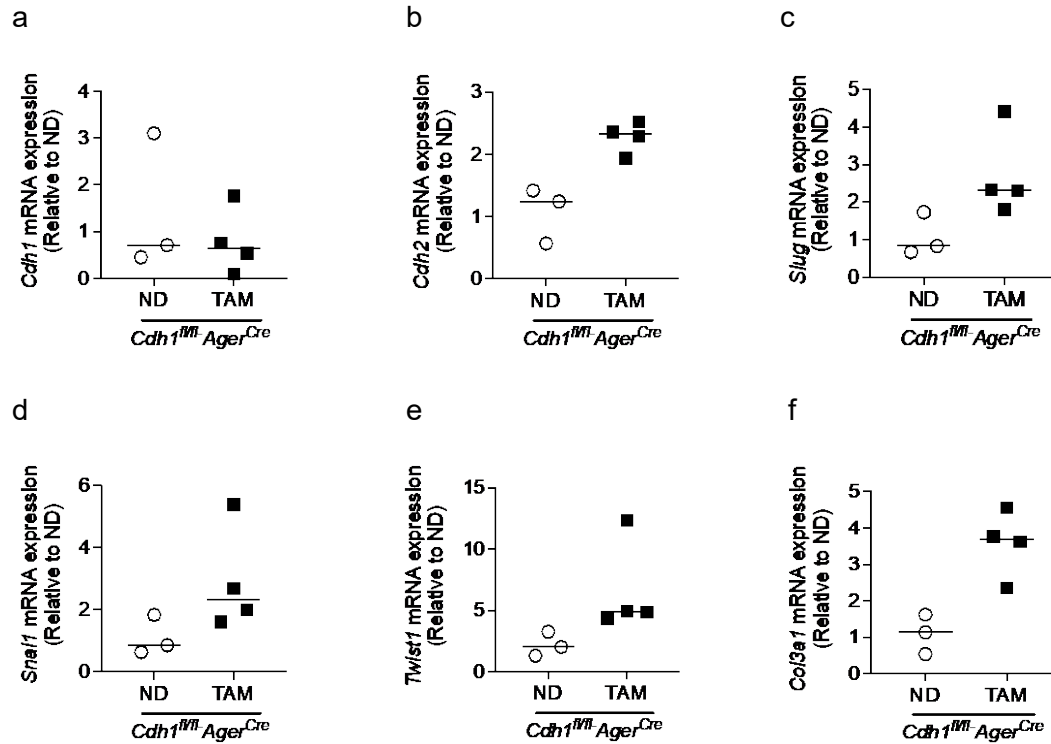

**Fig. S1: Increased mRNA expression of mesenchymal and collagen markers in E-cadherin knockdown in AT1 cells of mice.** To knock down E-cadherin in the AT1 cells of mice lungs, *Cdh1<sup>fl/fl</sup>-Ager<sup>Cre</sup>* mice were fed a tamoxifen diet (TAM) for 30 days. These were compared to *Cdh1<sup>fl/fl</sup>-Ager<sup>Cre</sup>* mice receiving a normal chow diet (ND). Basal mRNA expression of (a) epithelial – *Cdh1* was not altered, whereas mesenchymal – (b) *Cdh2*, (c) *Slug*, (d) *Snai1*, and (e) *Twist1* and collagen (f) *Col3a1* markers were increased after E-cadherin was knocked down in AT1 cells. Data is expressed as median bars and representative of 3 to 4 mice per group. Mann-Whitney test was performed and  $P < 0.05$  was considered statistically significant.

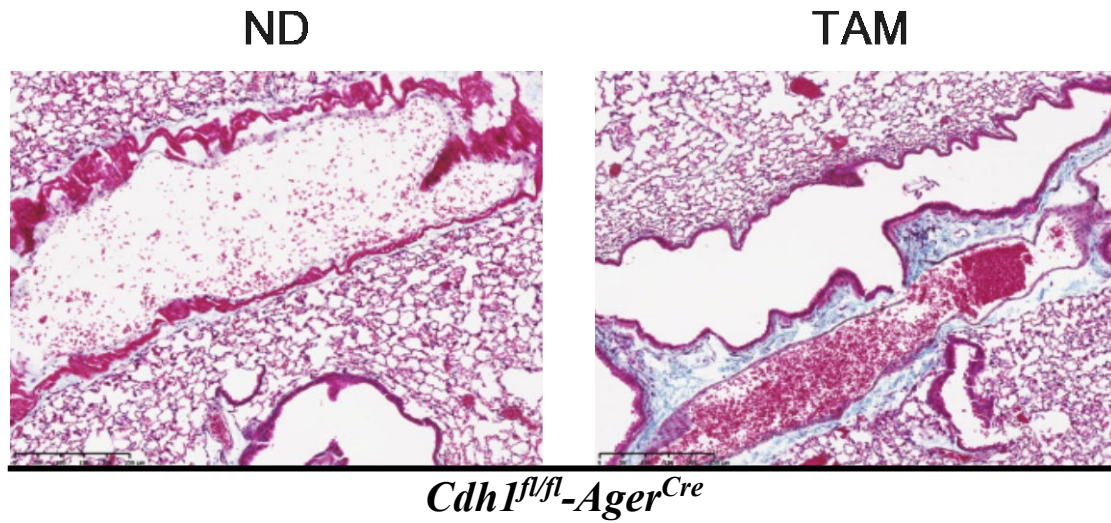

**Fig. S2. E-cadherin knockdown in AT1 cells causes fibrosis.** To knock down E-cadherin in the AT1 cells of mice lungs, *Cdh1<sup>fl/fl</sup>-Ager<sup>Cre</sup>* mice were fed a tamoxifen diet (TAM) for 30 days. These were compared to *Cdh1<sup>fl/fl</sup>-Ager<sup>Cre</sup>* mice receiving a normal chow diet (ND). The mice lung sections were stained with Masson trichrome. Mice lungs with E-cadherin knockdown in AT1 cells display areas of fibrosis due to excess deposition of collagen bundles (blue coloration) at 10X (scale bar of 250  $\mu$ m).

a

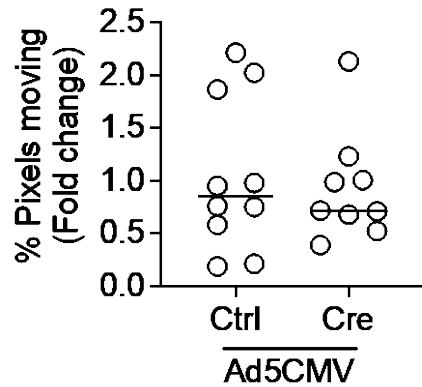

b

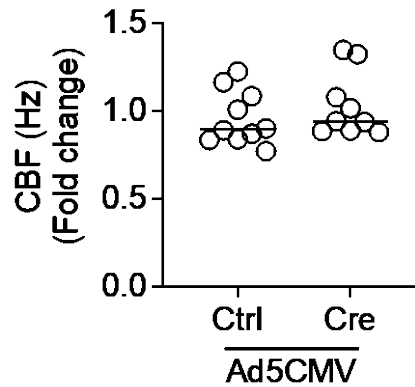

**Figure S3: Loss of E-cadherin in mice tracheal epithelial cells (mTECs) does not affect the percentage of the ciliated cells and its ciliary beat frequency (CBF).** To knock down E-cadherin in airways, mTECs from *Cdh11<sup>fl/fl</sup>* mice cultured at the air-liquid interface (ALI) were transfected with Ad5CMVCre-eGFP (Cre) at  $2 \times 10^9$  pfu and these were compared to Ad-5CMVeGFP (Ctrl). **(a)** Percentage of ciliated cells (% pixels moving) and **(b)** CBF were not altered due to knockdown of E-cadherin. Data is expressed as median bars and representative of cells derived from 12 mice and 9 to 10 inserts. Mann-Whitney test was performed, and  $P < 0.05$  was statistically significant.

a

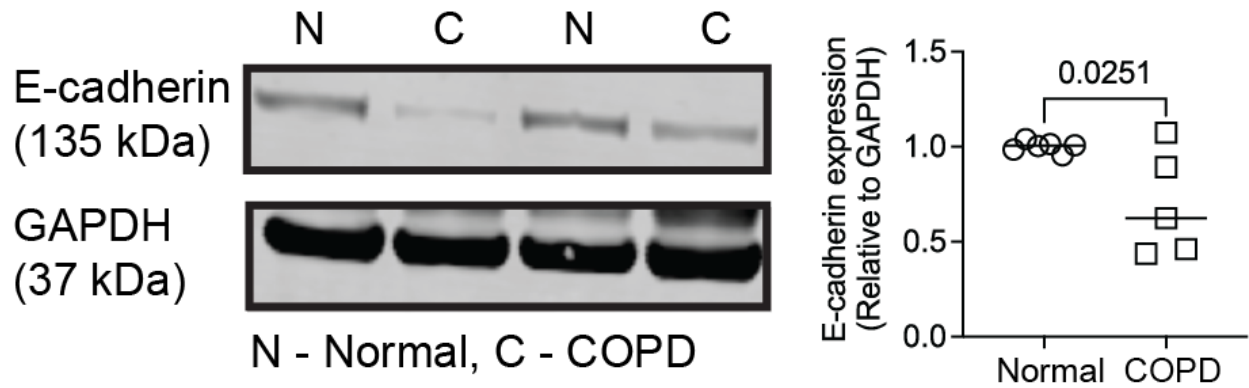

b

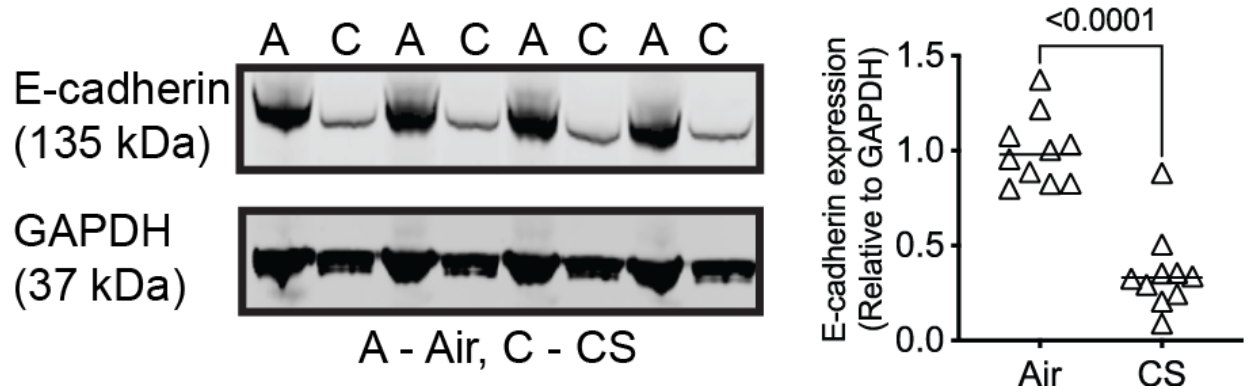

**Figure S4. E-cadherin is reduced in COPD and cigarette-smoke (CS) injured epithelium. (a)** COPD human bronchial epithelial cells have reduced expression of E-cadherin as compared to age, and sex-matched non-diseased human bronchial epithelial (Normal) cells (representative image – left panel, and quantified blot – right panel). Data is expressed as median bars and representative of 2 to 3 inserts from 2 donors. **(b)** Normal cells exposed to cigarette smoke (CS) demonstrate reduced E-cadherin expression as compared to air control (representative image – left panel, and quantified blot – right panel). Data is expressed as median bars and representative of 3 to 4 inserts from 3 donors. Mann-Whitney test was performed and  $P < 0.05$  was considered statistically significant.

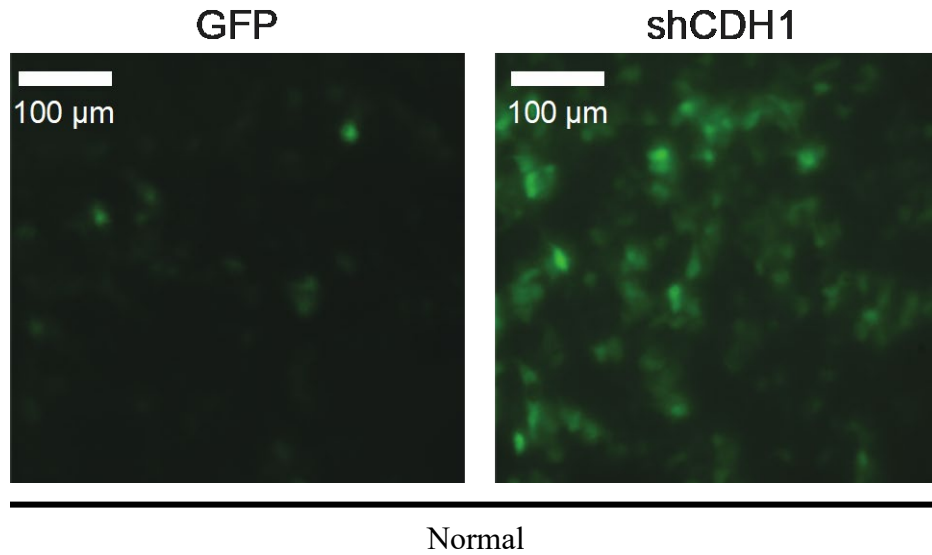

**Figure S5: Representative image of Green Fluorescent Protein (GFP) at 20X of the non-diseased airway epithelium (Normal) at 4 to 6 weeks air-liquid interface (ALI) transfected with Adenovirus to knock out E-cadherin.** Normal cells were transfected with Ad-GFP-U6-h-CFL1-shRNA (shCDH1) at  $1.5 \times 10^9$  pfu to knock down E-cadherin and these were compared to control adenovirus (Ad-GFP-U6-shRNA, GFP).

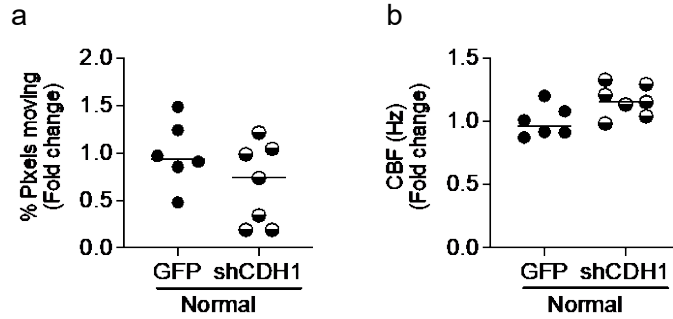

**Figure S6: Loss of E-cadherin in non-diseased airway epithelia does not affect the percentage of the ciliated cells and its ciliary beat frequency (CBF).** Normal cells were transfected with Ad-GFP-U6-h-CFL1-shRNA (shCDH1) at  $1.5 \times 10^9$  pfu to knock down E-cadherin and these were compared to control adenovirus (Ad-GFP-U6-shRNA, GFP). **(a)** Percentage of ciliated cells (% pixels moving) and **(b)** CBF were not altered due to knockdown of E-cadherin in Normal. Data is expressed as median bars and representative of 3 donors and 2 to 3 inserts per donor. Mann-Whitney test was performed and  $P < 0.05$  was considered statistically significant.

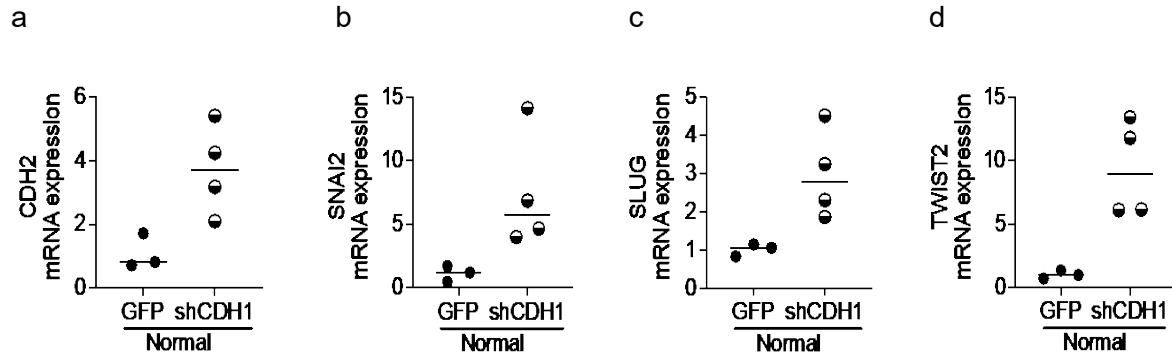

**Figure S7: Loss of E-cadherin in non-diseased airway epithelia (Normal) increases mesenchymal markers.** Normal cells were transfected with Ad-GFP-U6-h-CFL1-shRNA (shCDH1) at  $1.5 \times 10^9$  pfu to knock down E-cadherin and these were compared to control adenovirus (Ad-GFP-U6-shRNA, GFP). Normal cells with E-cadherin knockdown showed an increase in mesenchymal markers such as (a) *CDH2*, (b) *SNAI2*, (c) *SLUG*, and (d) *TWIST2*. Data is expressed as median bars and representative of 3 donors and 1 insert per donor. Mann-Whitney test was performed and  $P < 0.05$  was considered statistically significant.



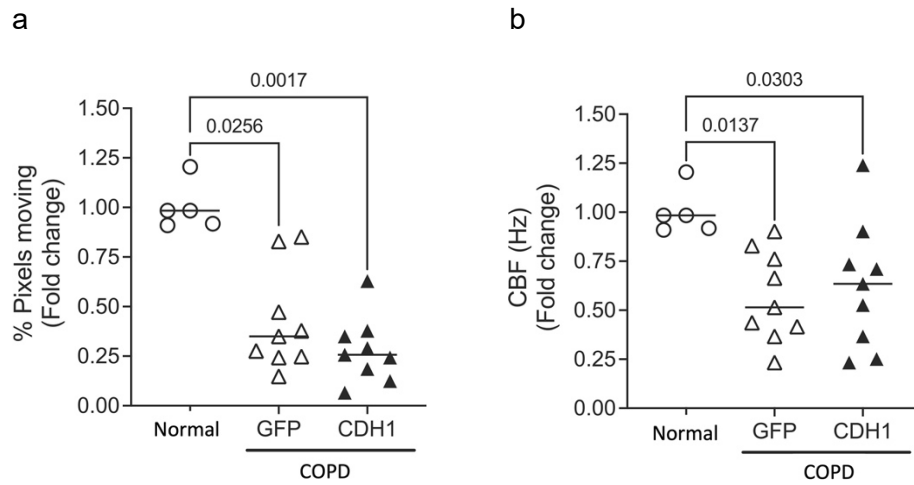

**Fig. S8: Overexpression of E-cadherin in COPD epithelia does not affect the percentage of the ciliated cells and its ciliary beat frequency (CBF).** COPD at 4 to 6 weeks ALI were transfected Ad-GFP-U6-h-CDH1 (CDH1) to overexpress E-cadherin or Ad-GFP (GFP) as control at  $2 \times 10^9$  pfu. Transfection of COPD with CDH1 did not alter **(a)** percentage of ciliated cells (% pixels moving) and **(b)** CBF, as compared to COPD, transfected to GFP and age- and gender-matched Normal cells. Data is expressed as median bars and representative of 5 to 9 inserts from 2 donors. Kruskal-Wallis's test followed by Dunn's multiple comparison test was performed.  $P < 0.05$  were considered statistically significant.

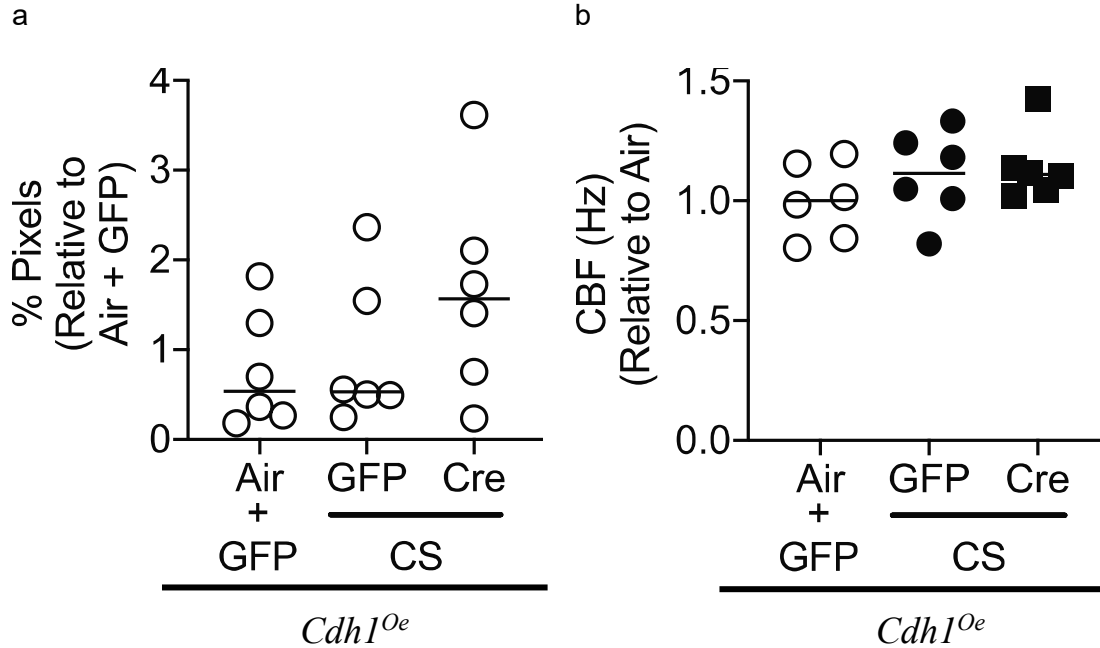

**Fig. S9: E-cadherin knock-in mice tracheal epithelial cells (mTECs) does not affect the percentage of the ciliated cells and its ciliary beat frequency (CBF).** To induce the over-expression of E-cadherin in *Cdh1* knock-in mice (*Cdh1<sup>Oe</sup>*), mTECs were transfected with adeno-Cre (Ad5CMVCre-eGFP) at  $2 \times 10^9$  pfu and were exposed to CS for 10 days. Knock-in of E-cadherin in mTECs did not alter **(a)** percentage of ciliated cells (% pixels moving) and **(b)** CBF. Data is expressed as median bars and representative of 6 inserts from 6 mice. Shapiro-Wilk test followed by Kruskal-Wallis multiple comparison tests was performed, and  $P < 0.05$  were considered statistically significant.

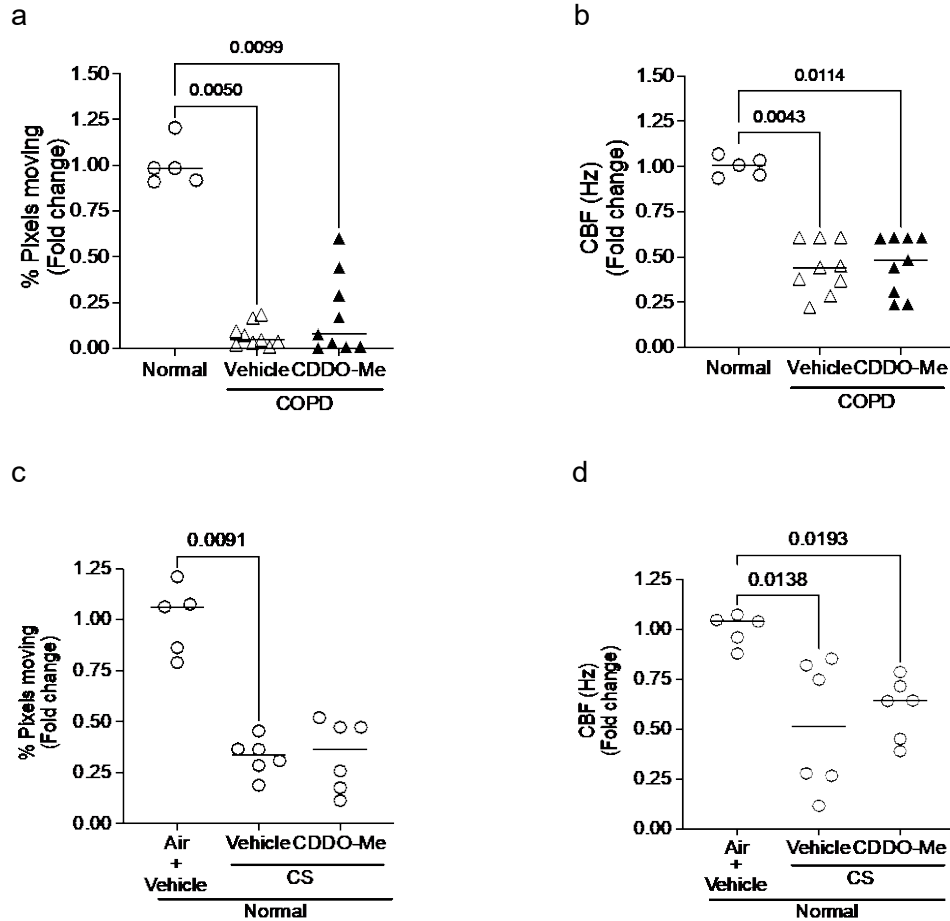

**Fig. S10: Nrf2-activator does not protect loss of cilia or decreased ciliary beat frequency in COPD and cigarette-smoke exposed epithelia.** The COPD or the Normal epithelial cells exposed to cigarette smoke (CS) were treated with 100 nM of CDDO-Me (a Nrf2 pathway activator) for 5 days and 10 days respectively. COPD treated with CDDO-Me did not restore (a) percentage of ciliated cells (% pixels moving) and (b) ciliary beat frequency as compared to non-diseased epithelial cells. Similarly, CS exposed Normal cells treated with CDDO-Me did not restore CS induces (c) loss of ciliated cells and (d) CBF as compared to air exposed Normal cells. Data is representative of 5 to 9 inserts from 2 donors. Shapiro-Wilk test followed by Kruskal-Wallis multiple comparison tests was performed.  $P < 0.05$  were considered statistically significant.

Uncropped gel blots for Fig. 6B

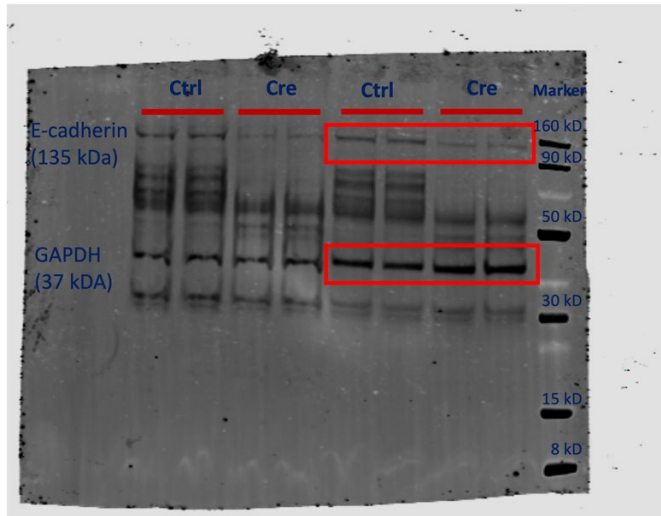

Uncropped gel blots for Fig. 6F

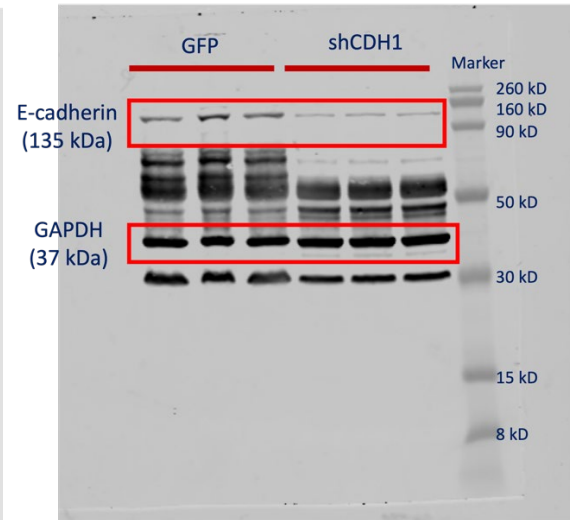

Uncropped gel blots for Fig. S4A

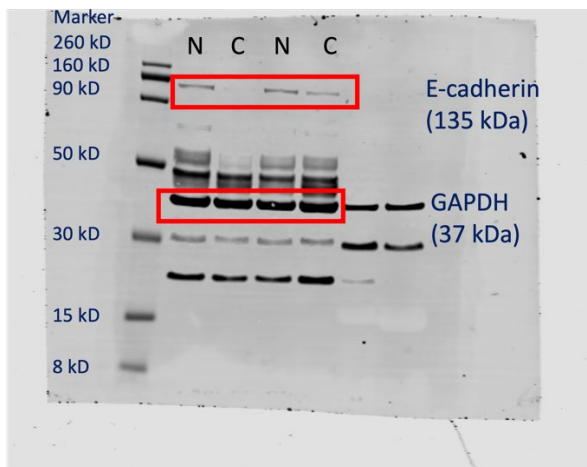

Uncropped gel blots for Fig. S4B

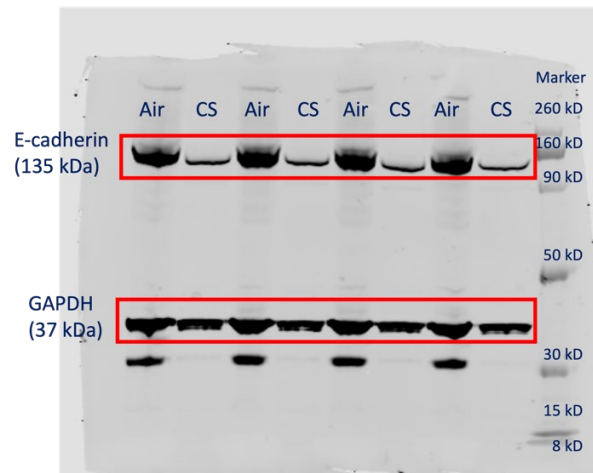

**Fig. S11:** Original and uncropped gel blots of manuscript. Red border indicates the lanes used in manuscript.
